# Supplementary material
Source: PubMed Central journal article supplement (PMC9400038)
Supplement: NIHMS1816599-supplement-1.pdf [file NIHMS1816599-supplement-1.pdf]

# THE LANCET

## Global Health

### Supplementary appendix

This appendix formed part of the original submission and has been peer reviewed.  
We post it as supplied by the authors.

Supplement to: Alatise OI, Dare AJ, Akinyemi PA, et al. Colorectal cancer screening with fecal immunochemical testing: a community-based, cross-sectional study in average-risk individuals in Nigeria. *Lancet Glob Health* 2022; **10**: e1012–22.

# Appendix

Supplementary Table A: Participant symptoms, co-morbidities & cancer knowledge

|                                                                | Study catchment area (state) |                |                |                     |
|----------------------------------------------------------------|------------------------------|----------------|----------------|---------------------|
|                                                                | Osun<br>n=1150               | Lagos<br>n=523 | Kwara<br>n=657 | All sites<br>n=2330 |
| History of blood in stool (>6mo ago)                           | 50 (4)                       | 72 (14)        | 52 (8)         | 174 (8)             |
| Perceptions on cause of blood in stool                         |                              |                |                |                     |
| Peptic ulcer                                                   | 0/50 (0)                     | 2/72 (3)       | 1/52 (2)       | 3/174 (2)           |
| Hemorrhoids/Piles                                              | 18/50 (36)                   | 28/72 (39)     | 18/52 (35)     | 64/174 (37)         |
| Dysentery                                                      | 4/50 (8)                     | 1/72 (1)       | 2/52 (4)       | 7/174 (4)           |
| Worms                                                          | 1/50 (2)                     | 0/72 (0)       | 0/52 (0)       | 1/174 (1)           |
| Malaria                                                        | 0/50 (0)                     | 0/72 (0)       | 0/52 (0)       | 0/174 (0)           |
| Constipation                                                   | 3/50 (6)                     | 10/72 (14)     | 13/52 (25)     | 26/174 (15)         |
| Eating sugar                                                   | 6/50 (12)                    | 8/72 (11)      | 5/52 (10)      | 19/174 (11)         |
| Don't know                                                     | 7/50 (14)                    | 9/72 (13)      | 7/52 (13)      | 23/174 (13)         |
| Other                                                          | 6/50 (12)                    | 14/72 (19)     | 8/52 (15)      | 28/174 (16)         |
| Sought medical assistance for blood in stool                   | 19/50 (38)                   | 19/72 (26)     | 16/52 (31)     | 54/174 (31)         |
| Diagnosis if medical assistance sought                         |                              |                |                |                     |
| Hemorrhoids/Piles                                              | 10/19 (40)                   | 10/19 (53)     | 6/16 (38)      | 26/54 (48)          |
| Dysentery                                                      | 1/19 (4)                     | 0/19 (0)       | 0/16 (0)       | 1/54 (2)            |
| Infection/Parasite                                             | 2/19 (8)                     | 0/19 (0)       | 1/16 (6)       | 3/53 (6)            |
| Cancer                                                         | 0/19 (0)                     | 0/19 (0)       | 0/16 (0)       | 0/54 (0)            |
| Don't know                                                     | 4/19 (16)                    | 5/19 (26)      | 5/16 (31)      | 14/54 (26)          |
| Other                                                          | 2/19 (8)                     | 1/19 (5)       | 4/16 (25)      | 7/54 (13)           |
| Change in bowel habit                                          | 127 (11)                     | 61 (12)        | 66 (10)        | 253 (11)            |
| Unexplained weight loss                                        | 30 (3)                       | 21 (4)         | 31 (5)         | 82 (4)              |
| Fatigue                                                        | 166 (14)                     | 49 (10)        | 57 (9)         | 272 (12)            |
| Recent treatment for GI parasitic infection                    | 104 (9)                      | 43 (8)         | 42 (6)         | 189 (8)             |
| History of anal fissure                                        | 319 (28)                     | 163 (32)       | 172 (26)       | 654 (28)            |
| Pre-menopausal (women only)                                    | 76/664 (12)                  | 50 (17)        | 67 (17)        | 193 (14)            |
| Smoking status                                                 |                              |                |                |                     |
| Current-smoker                                                 | 17 (2)                       | 7 (1)          | 11 (2)         | 35 (2)              |
| Ex-smoker                                                      | 42 (4)                       | 16 (3)         | 30 (5)         | 88 (4)              |
| Never smoker                                                   | 1091 (95)                    | 501 (96)       | 615 (94)       | 2207 (95)           |
| Alcohol use                                                    |                              |                |                |                     |
| Current alcohol use                                            | 123 (11)                     | 104 (20)       | 38 (6)         | 265 (11)            |
| Previous alcohol use, none now                                 | 104 (9)                      | 39 (7)         | 49 (8)         | 192 (8)             |
| Never drinker                                                  | 923 (80)                     | 381 (73)       | 569 (87)       | 1873 (80)           |
| Co-morbidities                                                 |                              |                |                |                     |
| Tuberculosis (TB)                                              | 11 (1)                       | 8 (2)          | 5 (1)          | 24 (1)              |
| Malaria                                                        | 563 (49)                     | 289 (55)       | 311 (47)       | 1163 (50)           |
| HIV                                                            | 4 (0)                        | 3 (1)          | 6 (1)          | 13 (1)              |
| HBV                                                            | 6 (1)                        | 7 (1)          | 9 (1)          | 22 (1)              |
| HCV                                                            | 0 (0)                        | 0 (0)          | 1 (0)          | 1 (0)               |
| COPD                                                           | 0 (0)                        | 2 (0)          | 8 (1)          | 10 (0)              |
| Sickle cell disease                                            | 3 (0)                        | 2 (0)          | 3 (1)          | 8 (0)               |
| Peptic ulcer disease                                           | 141 (12)                     | 83 (16)        | 187 (29)       | 411 (18)            |
| Diabetes                                                       | 61 (5)                       | 31 (6)         | 63 (10)        | 155 (7)             |
| Hypertension                                                   | 332 (29)                     | 154 (29)       | 247 (38)       | 733 (32)            |
| Myocardial infarction                                          | 3 (0)                        | 1 (0)          | 8 (1)          | 12 (1)              |
| Hyperlipidemia                                                 | 13 (1)                       | 45 (9)         | 9 (1)          | 67 (3)              |
| Stroke/TIA                                                     | 3 (0)                        | 2 (0)          | 3 (0)          | 8 (0.3)             |
| Asthma                                                         | 11 (1)                       | 12 (2)         | 15 (2)         | 38 (1.6)            |
| Epilepsy                                                       | 0 (0)                        | 0 (0)          | 0 (0)          | 0 (0)               |
| Colon cancer                                                   | 0 (0)                        | 0 (0)          | 0 (0)          | 0 (0)               |
| Other cancer                                                   | 1 (0)                        | 2 (0)          | 6 (1)          | 9 (0.4)             |
| Medication use (past 7 days)                                   |                              |                |                |                     |
| Acetaminophen                                                  | 389 (34)                     | 223 (43)       | 335 (51)       | 947 (41)            |
| Aspirin (ASA)                                                  | 22 (2)                       | 35 (7)         | 41 (6)         | 98 (4)              |
| NSAID                                                          | 171 (15)                     | 106 (20)       | 114 (17)       | 391 (17)            |
| Blood thinner (not ASA)                                        | 2 (0)                        | 35 (7)         | 31 (5)         | 68 (3)              |
| Vitamin C                                                      | 98 (9)                       | 158 (30)       | 115 (18)       | 371 (16)            |
| Other medication                                               | 308 (27)                     | 209 (40)       | 243 (37)       | 760 (33)            |
| Herbal/traditional medication use                              | 374 (33)                     | 240 (46)       | 279 (42)       | 893 (38)            |
| Family History of Colorectal Cancer                            |                              |                |                |                     |
| Yes                                                            | 6 (1)                        | 3 (1)          | 9 (1)          | 18 (1)              |
| Don't know                                                     | 19 (2)                       | 4 (1)          | 15 (2)         | 38 (2)              |
| Family History of cancer                                       | 53 (5)                       | 36 (7)         | 42 (6)         | 131 (6)             |
| Yes                                                            | 53 (5)                       | 36 (7)         | 42 (6)         | 131 (6)             |
| Don't know                                                     | 20 (2)                       | 12 (2)         | 9 (1)          | 41 (2)              |
| Prior cancer screening (any type, both sexes)                  | 148 (13)                     | 188 (36)       | 141 (22)       | 477 (20)            |
| Type of previous cancer screening                              |                              |                |                |                     |
| Breast (denominator: total women)                              | 61 (9)                       | 80 (26)        | 63 (16)        | 204 (15)            |
| Cervical (denominator: total women)                            | 50 (8)                       | 64 (21)        | 47 (12)        | 161 (12)            |
| Prostate (denominator: total men)                              | 24 (5)                       | 26 (12)        | 25 (6)         | 75 (8)              |
| Other                                                          | 13 (1)                       | 17 (3)         | 6 (1)          | 36 (2)              |
| Discussed CRC screening with health provider previously        | 12 (1)                       | 8 (2)          | 7 (1)          | 27 (1)              |
| Previously advised to get a colonoscopy/flexible sigmoidoscopy | 4 (0)                        | 8 (2)          | 3 (1)          | 15 (1)              |
| Recognition/knowledge of symptoms associated with CRC          |                              |                |                |                     |
| Rectal bleeding                                                | 101 (9)                      | 90 (17)        | 79 (12)        | 270 (12)            |
| Abdominal pain                                                 | 69 (6)                       | 101 (19)       | 52 (8)         | 222 (10)            |
| Change in bowel habit (weeks-months)                           | 83 (7)                       | 91 (17)        | 47 (7)         | 221 (10)            |
| Incomplete evacuation bowels                                   | 81 (7)                       | 76 (15)        | 41 (6)         | 198 (9)             |
| Blood in stool                                                 | 120 (10)                     | 119 (23)       | 84 (13)        | 323 (14)            |

Data are n (%), or median (lower-upper quartile) unless otherwise stated. Records with missing values were excluded for all variables.

Percentages are rounded to nearest whole number.

**Supplementary Table B: FIT Test Perceptions - Return Day Questionnaire**

|                                                                          | Study catchment area |                    |                    |                         |
|--------------------------------------------------------------------------|----------------------|--------------------|--------------------|-------------------------|
|                                                                          | Osun<br>n=1054 (%)   | Lagos<br>n=459 (5) | Kwara<br>n=597 (%) | All sites<br>n=2110 (%) |
| FIT Perceptions Survey Return Rate                                       | 1054/1150 (92)       | 459/524 (88)       | 597/656 (91)       | 2110/2330 (91)          |
| How would you rate your overall test experience?                         |                      |                    |                    |                         |
| Very bad                                                                 | 3 (0)                | 0 (0)              | 0 (0)              | 3 (0)                   |
| Bad                                                                      | 1 (0)                | 0 (0)              | 0 (0)              | 1 (0)                   |
| Neutral                                                                  | 2 (0)                | 0 (0)              | 0 (0)              | 2 (0)                   |
| Good                                                                     | 153 (15)             | 46 (10)            | 61 (10)            | 260 (11)                |
| Very good                                                                | 893 (85)             | 413 (90)           | 536 (90)           | 1842 (79)               |
| Would you participate in stool testing for cancer if screening was free? |                      |                    |                    |                         |
| Yes                                                                      | 1030 (98)            | 455 (99)           | 595 (100)          | 2080 (89)               |
| No                                                                       | 5 (1)                | 4 (1)              | 1 (0)              | 10 (0)                  |
| Missing                                                                  | 19 (2)               | 0 (0)              | 1 (0)              | 20 (1)                  |
| Would you recommend the test to family or friends?                       |                      |                    |                    |                         |
| Yes                                                                      | 1041 (99)            | 457 (100)          | 595 (100)          | 2093 (90)               |
| No                                                                       | 1 (0)                | 1 (0)              | 1 (0)              | 3 (0)                   |
| Unsure                                                                   | 2 (0)                | 0 (0)              | 1 (0)              | 3 (0)                   |
| Missing                                                                  | 10 (1)               | 1 (0)              | 0 (0)              | 11 (1)                  |
| The test was easy to use                                                 |                      |                    |                    |                         |
| Strongly disagree                                                        | 4 (0)                | 0 (0)              | 0 (0)              | 4 (0)                   |
| Disagree                                                                 | 1 (0)                | 0 (0)              | 3 (1)              | 4 (0)                   |
| Neutral                                                                  | 2 (0)                | 1 (0)              | 1 (0)              | 4 (0)                   |
| Agree                                                                    | 188 (18)             | 41 (9)             | 54 (9)             | 283 (12)                |
| Strongly agree                                                           | 844 (80)             | 416 (91)           | 539 (90)           | 1799 (77)               |
| Would you pay to have this test performed?                               |                      |                    |                    |                         |
| Yes                                                                      | 802 (76)             | 408 (89)           | 490 (82)           | 1700 (73)               |
| No                                                                       | 252 (24)             | 51 (11)            | 107 (18)           | 410 (18)                |
| If yes, how much (Naira)?                                                |                      |                    |                    |                         |
| Median                                                                   | 1000                 | 2000               | 1000               | 1500                    |
| IQR                                                                      | 500-3000             | 1000-5000          | 1000-3000          | 1000-5000               |

Data are n (%), or median (IQR) unless otherwise stated. Records with missing values were excluded for all variables.

## **African Research Group for Oncology (ARGO) Colorectal Screening & Early Detection Working Group Members**

Olusegun I. Alatise, MD; T. Peter Kingham, MD; Fatimah B Abdulkareem, MD; Samuel A. Olatoke, MD; Anna J. Dare, PhD; Patrick A. Akinyemi, PhD; Gregory C. Knapp, MD; Oluwabusayomi R. Ademakinwa, PhD; Ademola A. Adeyeye, MD; Olayide S. Agodirin, MD; Kabir B. Badmus, MD; Mathew O. Bojuwoye, MD; Matteo Di Bernardo, BA; Rivka Kahn, CCRP; Abdulrazzaq O. Lawal, MD; Emuobor A. Odeghe, MD; Samson G. Ogunleye, MSc; Olalekan O. Olasehinde, MD; Olajide T Olagboyega, MD; Christina Olcese, BS; Abdulfatai B. Olokoba, MD; Tosin Omoyiola, MD; Nnamdi O. Orak, MD; Adedapo O. Osinowo, MD; Ganiyat K. Oyeleke, MD; Israel A. Owoade, MD; Katherine Randolph, BA; Ranelle Tulloch, MPH
